# Supplementary material for: Women’s empowerment for farm resilience in Ethiopia: a three-step approach for latent class analysis
Source: Springer Nature journal article supplement (doi:10.1007/s41130-025-00243-2), 2025-11-06
Supplement: MOESM1 [file 41130_2025_243_MOESM1_ESM.docx]

# **Appendix – Supplementary Material**

**Section A1. Resilience Assessment Framework**

The manuscript focuses on the framework designed by Meuwissen et al. (2019) to assess the farm system resilience. The analytical framework is based on the five questions: *Resilience of what? Resilience to what? Resilience for what purpose? What resilience capacities? and What enhances resilience?* (Carpenter, Walker, Anderies, & Abel, 2001; Herrera, 2017).

Table A1. Farm Resilience Assessment

| **Questions** | **Assessment** | **Characteristics** | **Manuscript** |
| --- | --- | --- | --- |
| *Resilience of what?* | *Characterizing the main farm operation* | - Farm households - Community - Other systems | Farm households |
| *Resilience to what?* | *Identifying disturbances* | - Farm related shocks - Environmental shocks - Others | Farm related shocks |
| *Resilience for what purpose?* | *Farming system functioning* | - Private goods - Public goods | Private goods |
| *Resilience what capacity?* | *Identifying resilience capacity* | - Robustness - Adaptability - Transformation (Transition) | Robustness Capacity, Adaptive Capacity, and Transition Capacity |
| *What enhances resilience?* | *Identifying resilience attributes* | - Openness - Reserve - Feedback - Modularity - Diversity | Crop and livestock production, seed and fertilizer, diversity, crop rotation, state support (received seed for free), extension service, and resistance |

*Step-1: Characterizing the main farm operation (Resilience of what?)*

The first step should identify the primary operations of the system. The core focus is on the types of farms and their main product(s). While the farm operation is a part of the agro-ecological system, it may represent different socio-economic processes. Therefore, further steps are important to specify the type of farming system.

*Step-2: Identifying disturbances (Resilience to what?)*

According to Constas, Frankenberger, and Hoddinott (2014), the resilience measurement principle implies that resilience is shock and stressor-sensitive or specific. Therefore, detailed shock modules should be involved in assessing resilience. In addition, detailed data may be central to the analysis if resilience is measured in response to specific shocks and stressors.

*Step-3: Farming system functioning (Resilience for what purpose?)*

The core of the farming system can be explained by the functions that provide both private and public goods. While private goods include the production of farm products, public goods encompass welfare, livelihood, and other aspects of farm operations.

*Step-4: Identifying resilience capacity (Resilience What Capacity?)*

The framework for operationalising resilience measurement in agricultural farming systems falls under the categories of *traditional*, *vulnerability*, *capacity*, and *agroecology* positions (van der Lee et al., 2022). The majority of resilience measurements apply the capacity-based approach to represent farm resilience capacity.

Step-5: *Identifying resilience attributes (What enhances resilience?)*

Resilience attributes, which represent competences or constraints, manifest in agricultural practices, management, governance, and other socio-economic factors. According to Meuwissen et al. (2019), attributes include various farm characteristics that can be categorised into five items: modularity, feedback, diversity, openness and reserve. Modularity, which shows the connection between farm practices, is important for reorganising farm operations in response to change. *Feedback* is another important attribute that indicates how a farm system responds to change (Walker, Holling, Carpenter, & Kinzig, 2004). Diversity is another farm system attribute that indicates how the functional-response mechanism is diversified to enhance farm resilience capacity (Kerner & Thomas, 2014). The following resilience attribute is openness, which shows the connection between different farm resilience modules within the internal system (Carpenter et al., 2001). The last attribute is *reserve,* which shows the stock of capital to maintain farm operations.

Table A2. Summary statistics

|  | **Mean** | **Std.** | **Min** | **Max** |
| --- | --- | --- | --- | --- |
| Gender Equality | 1.823 | 0.381 | 1 | 2 |
| Adaptive Capacity | 0.382 | 0.2775 | 0 | 1 |
| Resistance Capacity | 0.454 | 0.295 | 0 | 1 |
| Transition Capacity | 0.418 | 0.221 | 0 | 1 |
| Farm Resilience Capacity | 0.556 | 0.186 | 0 | 1 |
| Age | 33.782 | 19.618 | 17 | 85 |
| Higher education | 0.274 | 0.446 | 0 | 1 |
| Employed last 12 months | 0.093 | 0.290 | 0 | 1 |
| Financial assets | 0.520 | 0.891 | 0 | 9 |
| Household size | 5.502 | 2.556 | 1 | 20 |
| Non Food Expenditure in ETB | 624.598 | 1050.334 | 0 | 29350 |
| Total Shock | 14.081 | 3.992 | 0 | 40 |
| Addis Ababa and Oromia | 0.148 | 0.355 | 0 | 1 |
| Somali | 0.134 | 0.341 | 0 | 1 |
| Amhara | 0.161 | 0.367 | 0 | 1 |
| Benishangul-Gumuz | 0.045 | 0.208 | 0 | 1 |
| Southern Nations, Nationalities, and People’s Region (SNNPR) | 0.169 | 0.375 | 0 | 1 |
| Gambela | 0.085 | 0.279 | 0 | 1 |
| Harari | 0.087 | 0.282 | 0 | 1 |
| Afar | 0.048 | 0.215 | 0 | 1 |
| Dire Dawa | 0.105 | 0.306 | 0 | 1 |

Table A3. Summary statistics

|  | **Mean** | **Std.** | **Min** | **Max** |
| --- | --- | --- | --- | --- |
|  |  |  |  |  |
| Constructed variable (right bequeath, use the land as collateral, rent the land, and the make the improvement or investment in the land) | 0.262 | 0.392 | 0 | 1 |
| Right to use the parcel | 0.795 | 0.403 | 0 | 1 |
| Parcel ownership | 0.520 | 0.499 | 0 | 1 |
| Available name on the ownership document | 0.900 | 0.299 | 0 | 1 |
| Decision-maker on the parcel | 0.873 | 0.332 | 0 | 1 |
| Ownership to sell/rent the parcel | 0.875 | 0.329 | 0 | 1 |

**Sections A2. Women’s Empowerment through Latent Class Analysis**

The advantage of this method is that LCA helps identify the underlying structure of data by identifying homogeneous clusters with similar patterns of attitudes. Since women’s empowerment is an amorphous phenomenon, the findings have identified empowerment and gender role attitudes through latent classes. For example, Barth and Trübner (2018) applied LCA to identify classes with similar attitudes towards gender roles. Different authors applied a similar approach to identify gender roles in households (Casey et al., 2016; Moors, 2003; Vaughan, Wong, & Middendorf, 2014; Yamaguchi, 2000). Musalia (2018) used LCA to cluster decision-making patterns among married women. Egamberdiev, Bobojonov, and Ren (2025) clustered *low autonomy* and *high autonomy* for purchasing assets, *coerced*, *medium coerced*, and *not coerced* for production, and *active member* and *not active member* for group membership. A series of studies demonstrated the pervasiveness of *egalitarian* and *conservative* or *traditional* classes with the applications of LCA (Barth & Trübner, 2018; Moors, 2003; Musalia, 2018; Yamaguchi, 2000), and the differences also reflected on working, education, and leisure classes of time use patterns (Chung & Lee, 2017). Using economic empowerment, economic and health decision-making, education, attitudes, and mobility, Bengesai and Derera (2021) identified three homogenous classes: the least empowered, the less empowered, and the most empowered. Similarly, other findings applied economic and education variables to construct empowerment latent classes (Yan & Chen, 2025). Although LCA quantifies and clusters multidimensional indicators, the applications for women’s empowerment in agriculture and resilience thinking remain a gap that should be addressed by analysing women’s empowerment in agricultural development and resilience thinking.

**Sections A3. Latent Class Analysis with Covariates**

The manuscript applies a three-step approach to establish a relationship between latent women’s empowerment and farm resilience as a distal outcome variable. Although the single-step approach, which includes the determinants of latent class and auxiliary variables, is frequently applied, it is associated with heavy computational processes, biased estimates, and incorrect standard errors (Bakk, Oberski, & Vermunt, 2016). Therefore, the extended three-step approach is proposed to overcome these challenges (Bray, Lanza, & Tan, 2015). According to Bakk and Vermunt (2016), the auxiliary variable can be regressed as a predictor or outcome variable of the latent categorical variable in the three-stage methodology (Figure A1). According to the three-step approach, the first step is used to construct a latent model without the inclusion of covariates. A second stage is used to obtain the latent class variables through the class membership. The third stage is used to analyse the latent variable (class membership) with covariate variables.


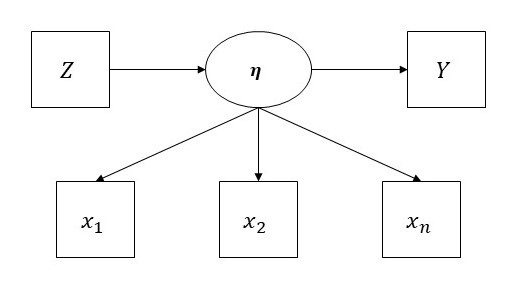


Fig.A1. Latent Class Conceptualization (three-step approach)

Source: Modified by Vermunt and Magidson (2021)

**Section A4. Estimating Latent Class Model Parameters**

For the latent variable with latent classes, is the prevalence of latent class . In this case, latent classes are mutually exclusive and exhaustive, allowing each observer to be a member of one and one on latent class. Therefore, the following equation defines latent class membership:

|  | (1) |
| --- | --- |

The following parameter is the item-response probabilities, represented by for the probability of response with observed variable in the latent class . Therefore, the relationship between observed indicators and each latent class is expressed through the set of parameters. In this case, the vector of item-response probabilities for a particular variable should be equal to 1 because the respondents should provide only one response to variable Therefore, for all :

|  | (2) |
| --- | --- |

**Section A5. Farm Resilience Measurement**

For measuring resilience, various methods are widely applied to quantify the resilience of households and livelihood (Angeon & Bates, 2015; Béné, Chowdhury, Rashid, Dhali, & Jahan, 2017; d’Errico, Romano, & Pietrelli, 2018; Egamberdiev, Bobojonov, Kuhn, & Glauben, 2023). For the resilience application, the manuscript uses resilience in farming systems. The measurement of Farm Resilience Capacity (FRC) depends on three pillars: Robustness Capacity (RC), Adaptive Capacity (AC), and Transformation Capacity (TC) (Figure A2). A similar measurement approach for constructing a resilience capacity was applied to agriculture and food security analysis (Alinovi, Mane, & Romano, 2010; Asiimwe et al., 2020; Egamberdiev et al., 2023).


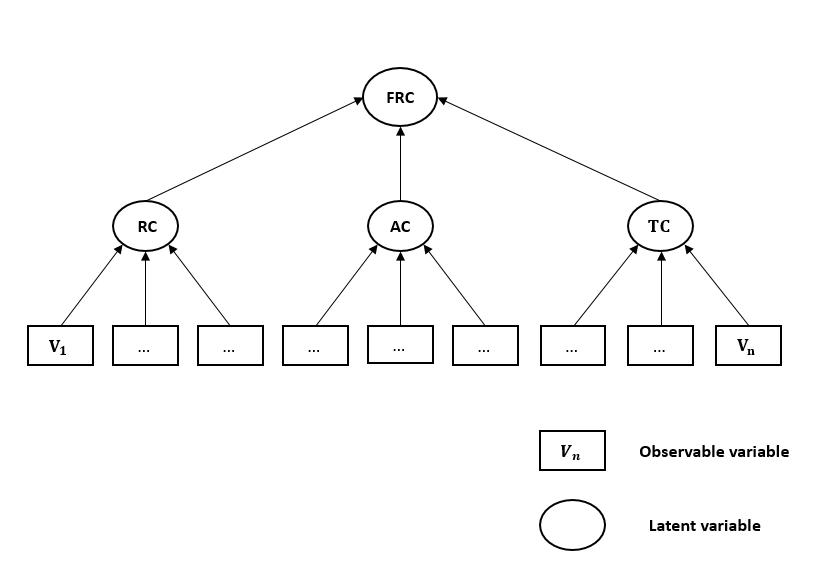


Fig.A2. Path Diagram of Farm Resilience Index

*Note: RC – Robustness Capacity; AC – Adaptive Capacity; TC – Transition Capacity; and FRC – Farm Resilience Capacity*

Table A4. Factorability Analysis

| **Index** | **Component** | **Cumulative Variance** |  |
| --- | --- | --- | --- |
| **Robustness Capacity** |  |  |  |
|  | 1 | 0.272 |  |
|  | 2 | 0.531 |  |
| Bartlett Test |  |  | 10.523* |
| KMO |  |  | 0.500 |
| determinant of R-matrix |  |  | 0.989 |
| **Adaptive Capacity** |  |  |  |
|  | 1 | 0.460 |  |
|  | 2 | 0.664 |  |
| Bartlett Test |  |  | 1584.988*** |
| KMO |  |  | 0.745 |
| determinant of R-matrix |  |  | 0.379 |
| **Transition Capacity** |  |  |  |
|  | 1 | 0.349 |  |
|  | 2 | 0.688 |  |
| Bartlett Test |  |  |  |
| KMO |  |  | 5.248*** |
| determinant of R-matrix |  |  | 0.997 |
| Bartlett Test |  |  | 0.500 |
| **Farm Resilience Capacity** |  |  |  |
|  | 1 | 0.378 |  |
|  |  |  |  |
| Bartlett Test |  |  | 11.331*** |
| KMO |  |  | 0.529 |
| determinant of R-matrix |  |  | 0.986 |

**Section A6. Summary Statistics of Observed Variables**

Table A5 information indicates that more than 90% of households are resistant to the loss of crop diversification. The farm’s livestock resistance over the time period is also relatively high, representing close to 90%. More than three-quarters of farm households experience crop damage resistance, while their resistance to shocks is noticeably low at 21.5%.

Table A5. Variables for Robustness Capacity

|  | Mean | Std. | Min | Max |
| --- | --- | --- | --- | --- |
| Simpson resistance dummy  (The variable is obtained through the difference between the crop diversification index for 2018 and 2021) | 0.948 | 0.220 | 0 | 1 |
| Livestock resistance dummy  (The variable is obtained through the difference between the number of livestock for 2018 and 2021) | 0.894 | 0.306 | 0 | 1 |
| Crop damage resistance dummy  (The variable is obtained through the difference between the damaged crops for 2018 and 2021) | 0.780 | 0.413 | 0 | 1 |
| Resistance to shocks  (The variable is obtained whether farm households were resistant to income decrease, asset decrease, production decrease, food stock decrease, and food purchase decrease over 2021) | 0.215 | 0.411 | 0 | 1 |

Summary statistics of selected variables in the adaptive capacity show that a small minority of farm households utilized extension services. A low level of seed aid at around 10% indicates that seed-related assistance is not on a significant scale in the selected regions. Improved seeds are scarce because just above quarter of farm households adopted improved seeds in farm operations. A fertilizer adoption rate is also low because a fertilizer index indicates that only one-third of farmers use fertilizers. Approximately 50% of farmers have crop rotations practices.

Table A6. Variables for Adaptive Capacity

|  | Mean | Std. | Min | Max |
| --- | --- | --- | --- | --- |
| Extension service  (The variable is obtained through Principal Component Analysis by including participating in extension programs, getting credit services, getting advisory service for agriculture, and participated in watershed activities) | 0.241 | 0.303 | 0 | 1 |
| Crop rotation | 0.478 | 0.499 | 0 | 1 |
| Improved seed | 0.304 | 0.460 | 0 | 1 |
| Received seed for free | 0.106 | 0.308 | 0 | 1 |
| Fertilizer index  (The variable is obtained through Principal Component Analysis by including manure dummy, NPS dummy, fertilizer dummy, and other fertilizer dummy) | 0.331 | 0.341 | 0 | 1 |

As for the Transition Capacity (TC), noticeably few farm households experience changes in parcel rent or mixed cropping. Close to one-fifth of households experience a change in the farm type.

Table A7. Variables for Transition Capacity

|  | Mean | Std. | Min | Max |
| --- | --- | --- | --- | --- |
| Change in parcel rent  (This variable is obtained through a parcel rent change for 2018 2021) | 0.116 | 0.320 | 0 | 1 |
| Change in mixed cropping  (This variable is obtained through a mixed cropping technique change for 2018 2021) | 0.212 | 0.409 | 0 | 1 |
| Change in farm type  (This variable is obtained through a farm type change for 2018 2021) | 0.188 | 0.391 | 0 | 1 |

**References**

Alinovi, L., Mane, E., & Romano, D. (2010). Measuring Household Resilience to Food Insecurity: Application to Palestinian Households. In *Agricultural Survey Methods* (pp. 341-368).

Angeon, V., & Bates, S. (2015). Reviewing Composite Vulnerability and Resilience Indexes: A Sustainable Approach and Application. *World Development, 72*, 140-162. doi:<https://doi.org/10.1016/j.worlddev.2015.02.011>

Asiimwe, R., Ainembabazi, J. H., Egeru, A., Isoto, R., Aleper, D. K., Namaalwa, J., & Diiro, G. M. (2020). The role of camel production on household resilience to droughts in pastoral and agro-pastoral households in Uganda. *Pastoralism, 10*(1), 5. doi:10.1186/s13570-020-0160-x

Bakk, Z., Oberski, D. L., & Vermunt, J. K. (2016). Relating Latent Class Membership to Continuous Distal Outcomes: Improving the LTB Approach and a Modified Three-Step Implementation. *Structural Equation Modeling: A Multidisciplinary Journal, 23*(2), 278-289. doi:10.1080/10705511.2015.1049698

Bakk, Z., & Vermunt, J. K. (2016). Robustness of Stepwise Latent Class Modeling With Continuous Distal Outcomes. *Structural Equation Modeling: A Multidisciplinary Journal, 23*(1), 20-31. doi:10.1080/10705511.2014.955104

Béné, C., Chowdhury, F. S., Rashid, M., Dhali, S. A., & Jahan, F. (2017). Squaring the Circle: Reconciling the Need for Rigor with the Reality on the Ground in Resilience Impact Assessment. *World Development, 97*, 212-231. doi:<https://doi.org/10.1016/j.worlddev.2017.04.011>

Bray, B. C., Lanza, S. T., & Tan, X. (2015). Eliminating Bias in Classify-Analyze Approaches for Latent Class Analysis. *Structural Equation Modeling: A Multidisciplinary Journal, 22*(1), 1-11. doi:10.1080/10705511.2014.935265

Carpenter, S., Walker, B., Anderies, J. M., & Abel, N. (2001). From Metaphor to Measurement: Resilience of What to What? *Ecosystems, 4*(8), 765-781. doi:10.1007/s10021-001-0045-9

Constas, M., Frankenberger, T., & Hoddinott, J. J. F. S. I. N., Resilience Measurement Technical Working Group, Technical Series. (2014). *Resilience measurement principles: Toward an agenda for measurement design*. Retrieved from

d’Errico, M., Romano, D., & Pietrelli, R. (2018). Household resilience to food insecurity: evidence from Tanzania and Uganda. *Food Security, 10*(4), 1033-1054. doi:10.1007/s12571-018-0820-5

Egamberdiev, B., Bobojonov, I., Kuhn, L., & Glauben, T. (2023). Household resilience capacity and food security: evidence from Kyrgyzstan. *Food Security, 15*(4), 967-988. doi:10.1007/s12571-023-01369-1

Herrera, H. (2017). Resilience for Whom? The Problem Structuring Process of the Resilience Analysis. *9*(7), 1196.

Kerner, D. A., & Thomas, J. S. (2014). Resilience Attributes of Social-Ecological Systems: Framing Metrics for Management. *Resources, 3*(4), 672-702. doi:10.3390/resources3040672

Meuwissen, M. P. M., Feindt, P. H., Spiegel, A., Termeer, C. J. A. M., Mathijs, E., Mey, Y. d., . . . Reidsma, P. (2019). A framework to assess the resilience of farming systems. *Agricultural Systems, 176*, 102656. doi:<https://doi.org/10.1016/j.agsy.2019.102656>

van der Lee, J., Kangogo, D., Gülzari, Ş. Ö., Dentoni, D., Oosting, S., Bijman, J., & Klerkx, L. (2022). Theoretical positions and approaches to resilience assessment in farming systems. A review. *Agronomy for Sustainable Development, 42*(2), 27. doi:10.1007/s13593-022-00755-x

Vermunt, J. K., & Magidson, J. (2021). How to Perform Three-Step Latent Class Analysis in the Presence of Measurement Non-Invariance or Differential Item Functioning. *Structural Equation Modeling: A Multidisciplinary Journal, 28*(3), 356-364. doi:10.1080/10705511.2020.1818084

Walker, B., Holling, C. S., Carpenter, S. R., & Kinzig, A. (2004). Resilience, Adaptability and Transformability in Social-ecological Systems. *Ecology and Society, 9*(2).
